# Supplementary material for: Influences of cation charge density on the photovoltaic performance of dye-sensitized solar cells: lithium, sodium, potassium, and dimethylimidazolium
Source: Royal Society of Chemistry journal article supplement (doi:10.1039/c1cp21020c), 2011-01-01
Supplement: c1cp21020c.pdf [file c1cp21020c.pdf]

*Electronic Supplementary Information for*

**Influences of cation charge density on the photovoltaic performance of dye-sensitized solar cells: lithium, sodium, potassium, and dimethylimidazolium**

**Yushuai Shi<sup>a,c</sup>, Yinghui Wang<sup>b</sup>, Min Zhang<sup>\*b</sup> and Xiandui Dong<sup>\*a</sup>**

<sup>a</sup>Engineering Laboratory for Modern Analytical Techniques, State Key Laboratory of Electroanalytical Chemistry, Changchun Institute of Applied Chemistry, Chinese Academy of Science, Changchun 130022, China. <sup>b</sup>State Key Laboratory of Polymer Physics and Chemistry, Changchun Institute of Applied Chemistry, Chinese Academy of Sciences, Changchun 130022, China, and <sup>c</sup>Graduate School, Chinese Academy of Sciences, Beijing 100039, China

---

\*To whom correspondence should be addressed. E-mail: min.zhang@ciac.jl.cn;  
dxd@ciac.jl.cn.

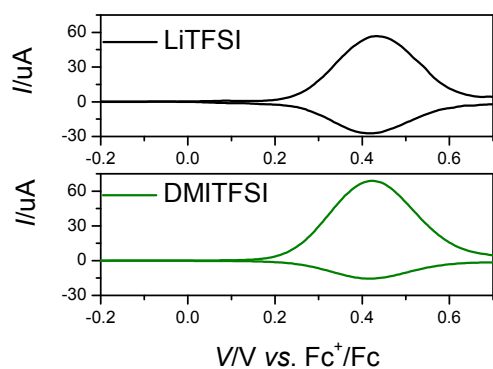

**Fig. S1** Square-wave voltammograms of C106 dye-coated titania films. Supporting electrolyte 0.3 M LiTFSI and 0.3 M DMITFSI. The measured ground-state redox potential of C106 were both  $-5.565$  eV *versus* vacuum.

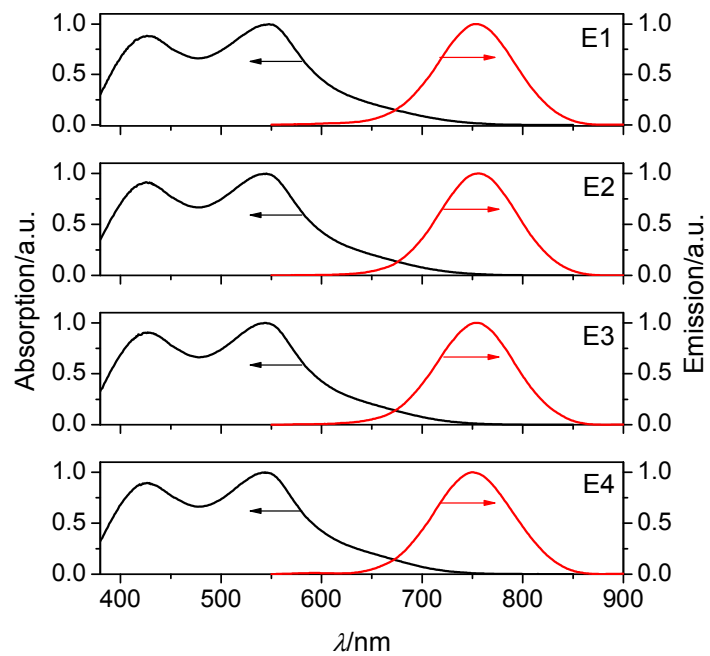

Fig. S2 Normalized absorptions and emissions of cells with electrolytes E1-E4. The obtained zero-zero transition energy  $E_{0-0}$  was 1.848 eV for all electrolyte systems.
